# Supplementary material for: Exploiting Vitamin D Receptor and Its Ligands to Target Squamous Cell Carcinomas of the Head and Neck
Source: Int J Mol Sci. 2023 Feb 28;24(5):4675. doi: 10.3390/ijms24054675 (PMC10002563; doi:10.3390/ijms24054675)
Supplement: Supplementary file 1 [file ijms-24-04675-s001.zip › ijms-2188293-supplementary.pdf]

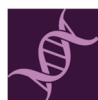

# Exploiting Vitamin D Receptor and its Ligands to Target Squamous Cell Carcinomas of the Head and Neck

Laura Koll <sup>1,†</sup>, Désirée Gül <sup>1,†</sup>, Manal I. Elnouaem<sup>2</sup>, Hanaa Raslan<sup>2</sup>, Omneya R. Ramadan<sup>2</sup>, Shirley K. Knauer<sup>3</sup>, Sebastian Strieth<sup>4</sup>, Jan Hagemann<sup>1</sup>, Roland H. Stauber<sup>1,\*</sup>, and Aya Khamis<sup>1,2,\*</sup>

<sup>1</sup> Department of Otorhinolaryngology Head and Neck Surgery, Molecular and Cellular Oncology, University Medical Center, 55131 Mainz, Germany

<sup>2</sup> Oral Pathology Department, Faculty of Dentistry, Alexandria University, 5372066 Alexandria, Egypt

<sup>3</sup> Centre for Medical Biotechnology (ZMB/CENIDE), Institute for Molecular Biology, University Duisburg-Essen, Universitätsstraße, 45117 Essen, Germany

<sup>4</sup> Department of Otorhinolaryngology, University Medical Center Bonn, 53127 Bonn, Germany

† These authors contributed equally to this work.

\* Correspondence: ayakhamis@uni-mainz.de (A.K.); rstauber@uni-mainz.de (R.H.S.) Tel.: +49-6131176030 (A.K. & R.H.S.)

Table S1. Antibodies used for Western Blot and immunofluorescence analyses.

| Antigen                      | Host   | Manufacturer and Article Number | Dilution (x-fold) |
|------------------------------|--------|---------------------------------|-------------------|
| <b>Western Blot Analysis</b> |        |                                 |                   |
| Actin                        | rabbit | Sigma Aldrich, A2066            | 5000              |
| VDR                          | mouse  | Santa Cruz; sc-13133            | 1000              |
| pmTOR                        | mouse  | Cell Signaling; 5536            | 1000              |
| pAKT                         | mouse  | Cell Signaling; 3787            | 1000              |
| Rabbit (HRP coupled)         | goat   | Cell Signaling; 7074            | 5000              |
| Mouse (HRP coupled)          | mouse  | Cell Signaling; 7076            | 5000              |

## Immunofluorescence

|                       |        |                      |     |
|-----------------------|--------|----------------------|-----|
| VDR                   | rabbit | Abcam ab3508         | 200 |
| RXR $\alpha$          | rabbit | Cell Signaling; 5388 | 200 |
| Rabbit (FITC coupled) | goat   | Dianova; 111-165-003 | 300 |
| Rabbit (Cy3 coupled)  | goat   | Dianova; 111-165-062 | 300 |

## Immunohistochemistry

|                            |        |                     |              |
|----------------------------|--------|---------------------|--------------|
| VDR                        | rabbit | Abcam ab3508        | 200          |
| Ki67                       | mouse  | Dako IR626          | Ready to use |
| DakoEnVision Flex (Linker) | goat   | Dako EnVision DM824 | Ready to use |

Table S2. Primer sequences

| Name           | Sequence (5' → 3')                    |
|----------------|---------------------------------------|
| VDR_fw         | TACCGAGCTCGGATCCCCTGGGCTCCACTTACCTG   |
| VDR_rev        | CCTCGCCCTTGCTAGCGGAGATCTCATTGCCAAACAC |
| ColPCR_pC3_fw  | CCCACTGCTTACTGGCTTAT                  |
| ColPCR_pC3_rev | AGCAGTACGATCTGGTCCT                   |

**Table S3.** Clinical tumor patient data (n=40) showing gender, age, tumor differentiation, VDR expression in tumor tissue, Vitamin D level in the patient serum before or on day of surgery, and tumor site. TNM and Stage according to the UICC (8<sup>th</sup> edition).

| No | Sex    | Age | Diff     | VDR exp. | VitD [ng/ml] | Site          | T              | N               | M              | Stage |
|----|--------|-----|----------|----------|--------------|---------------|----------------|-----------------|----------------|-------|
| 1  | Female | 62  | moderate | 291      | 5,2          | alveolar      | T <sub>2</sub> | N <sub>0</sub>  | M <sub>0</sub> | II    |
| 2  | Female | 66  | moderate | 254      | 6,8          | tongue        | T <sub>1</sub> | N <sub>0</sub>  | M <sub>0</sub> | I     |
| 3  | Female | 55  | moderate | 228      | 9,43         | tongue        | T <sub>1</sub> | N <sub>0</sub>  | M <sub>0</sub> | I     |
| 4  | Female | 73  | moderate | 295      | 4,66         | tongue        | T <sub>2</sub> | N <sub>1</sub>  | M <sub>0</sub> | III   |
| 5  | Female | 42  | poor     | 412      | 3,82         | tongue        | T <sub>2</sub> | N <sub>2a</sub> | M <sub>0</sub> | IV    |
| 6  | Female | 82  | moderate | 90,8     | 5,48         | tongue        | T <sub>2</sub> | N <sub>0</sub>  | M <sub>0</sub> | II    |
| 7  | Male   | 76  | well     | 8,6      | 14,9         | alveolar      | T <sub>1</sub> | N <sub>0</sub>  | M <sub>0</sub> | I     |
| 8  | Female | 49  | poor     | 486      | 4,22         | tongue        | T <sub>3</sub> | N <sub>1</sub>  | M <sub>0</sub> | III   |
| 9  | Female | 52  | poor     | 4070     | 4,3          | alveolar      | T <sub>4</sub> | N <sub>0</sub>  | M <sub>0</sub> | IV    |
| 10 | Female | 72  | moderate | 3340     | 4,52         | alveolar      | T <sub>2</sub> | N <sub>0</sub>  | M <sub>0</sub> | II    |
| 11 | Male   | 52  | moderate | 7,11     | 17,8         | tongue        | T <sub>1</sub> | N <sub>0</sub>  | M <sub>0</sub> | I     |
| 12 | Female | 65  | well     | 2990     | 8,69         | buccal mucosa | T <sub>1</sub> | N <sub>0</sub>  | M <sub>0</sub> | I     |
| 13 | Female | 48  | moderate | 250      | 6,39         | buccal mucosa | T <sub>2</sub> | N <sub>0</sub>  | M <sub>0</sub> | II    |
| 14 | Female | 53  | moderate | 659      | 4,11         | tongue        | T <sub>2</sub> | N <sub>0</sub>  | M <sub>0</sub> | II    |
| 15 | Male   | 58  | moderate | 8,37     | 13,6         | buccal mucosa | T <sub>1</sub> | N <sub>0</sub>  | M <sub>0</sub> | I     |
| 16 | Female | 55  | moderate | 294      | 4,66         | tongue        | T <sub>2</sub> | N <sub>1</sub>  | M <sub>0</sub> | III   |
| 17 | Female | 77  | poor     | 409      | 3,82         | Lip           | T <sub>4</sub> | N <sub>2a</sub> | M <sub>0</sub> | IV    |
| 18 | Female | 62  | moderate | 90,8     | 5,48         | tongue        | T <sub>3</sub> | N <sub>0</sub>  | M <sub>0</sub> | III   |
| 19 | Male   | 58  | well     | 8,3      | 14,9         | buccal mucosa | T <sub>1</sub> | N <sub>0</sub>  | M <sub>0</sub> | I     |
| 20 | Female | 60  | poor     | 493      | 4,22         | Lip           | T <sub>2</sub> | N <sub>1</sub>  | M <sub>0</sub> | III   |
| 21 | Female | 65  | moderate | 429      | 6,29         | alveolar      | T <sub>3</sub> | N <sub>0</sub>  | M <sub>0</sub> | III   |
| 22 | Female | 58  | moderate | 353      | 8,45         | tongue        | T <sub>2</sub> | N <sub>0</sub>  | M <sub>0</sub> | II    |
| 23 | Female | 60  | moderate | 134      | 7,25         | tongue        | T <sub>1</sub> | N <sub>0</sub>  | M <sub>0</sub> | I     |
| 24 | Female | 61  | moderate | 251      | 5,18         | tongue        | T <sub>1</sub> | N <sub>1</sub>  | M <sub>0</sub> | III   |
| 25 | Female | 53  | poor     | 102      | 8,24         | tongue        | T <sub>2</sub> | N <sub>2b</sub> | M <sub>0</sub> | IV    |
| 26 | Female | 52  | moderate | 354      | 9,28         | tongue        | T <sub>1</sub> | N <sub>0</sub>  | M <sub>0</sub> | I     |
| 27 | Male   | 53  | well     | 151      | 7,87         | alveolar      | T <sub>2</sub> | N <sub>0</sub>  | M <sub>0</sub> | II    |
| 28 | Female | 58  | poor     | 187      | 5,74         | tongue        | T <sub>2</sub> | N <sub>1</sub>  | M <sub>0</sub> | III   |
| 29 | Female | 65  | poor     | 319      | 9            | alveolar      | T <sub>3</sub> | N <sub>0</sub>  | M <sub>0</sub> | III   |
| 30 | Female | 57  | moderate | 488      | 7,34         | alveolar      | T <sub>1</sub> | N <sub>0</sub>  | M <sub>0</sub> | I     |

|    |        |    |          |     |      |               |                |                |                |    |
|----|--------|----|----------|-----|------|---------------|----------------|----------------|----------------|----|
| 31 | Male   | 65 | moderate | 388 | 7,78 | tongue        | T <sub>1</sub> | N <sub>0</sub> | M <sub>0</sub> | I  |
| 32 | Female | 64 | well     | 452 | 9,2  | buccal mucosa | T <sub>2</sub> | N <sub>0</sub> | M <sub>0</sub> | II |
| 33 | Female | 54 | moderate | 409 | 5,58 | buccal mucosa | T <sub>2</sub> | N <sub>0</sub> | M <sub>0</sub> | II |
| 34 | Female | 63 | moderate | 406 | 9,27 | tongue        | T <sub>2</sub> | N <sub>0</sub> | M <sub>0</sub> | II |
| 35 | Male   | 68 | moderate | 307 | 4,43 | buccal mucosa | T <sub>1</sub> | N <sub>0</sub> | M <sub>0</sub> | I  |
| 36 | Female | 63 | moderate | 462 | 9    | tongue        | T <sub>1</sub> | N <sub>0</sub> | M <sub>0</sub> | I  |
| 37 | Female | 70 | poor     | 150 | 6,29 | Lip           | T <sub>4</sub> | N <sub>1</sub> | M <sub>0</sub> | IV |
| 38 | Female | 55 | moderate | 151 | 8,25 | tongue        | T <sub>2</sub> | N <sub>0</sub> | M <sub>0</sub> | II |
| 39 | Male   | 58 | well     | 347 | 4,27 | buccal mucosa | T <sub>1</sub> | N <sub>0</sub> | M <sub>0</sub> | I  |
| 40 | Female | 60 | poor     | 359 | 9,38 | Lip           | T <sub>2</sub> | N <sub>0</sub> | M <sub>0</sub> | II |

**Table S4.** Control cases data (n=40) showing gender, age, and Vitamin D level in the control group.

| No | Sex    | Age | VitD [ng/ml] |
|----|--------|-----|--------------|
| 1  | Female | 39  | 25           |
| 2  | Female | 57  | 31,5         |
| 3  | Female | 62  | 30,5         |
| 4  | Female | 60  | 26           |
| 5  | Female | 58  | 32           |
| 6  | Female | 35  | 34           |
| 7  | Male   | 50  | 35           |
| 8  | Female | 72  | 40           |
| 9  | Female | 65  | 25           |
| 10 | Female | 55  | 23           |
| 11 | Male   | 45  | 25           |
| 12 | Female | 58  | 31,1         |
| 13 | Female | 65  | 30,5         |
| 14 | Female | 59  | 32,7         |
| 15 | Male   | 45  | 34,5         |
| 16 | Female | 61  | 35           |
| 17 | Female | 40  | 21           |
| 18 | Female | 45  | 22           |
| 19 | Male   | 35  | 23           |
| 20 | Female | 50  | 25,5         |
| 21 | Female | 55  | 25           |
| 22 | Female | 52  | 33           |
| 23 | Female | 53  | 25           |
| 24 | Female | 56  | 25           |
| 25 | Female | 46  | 31           |
| 26 | Female | 55  | 33           |
| 27 | Male   | 50  | 25,5         |
| 28 | Female | 45  | 32           |

|    |        |    |       |
|----|--------|----|-------|
| 29 | Female | 54 | 28,25 |
| 30 | Female | 54 | 31    |
| 31 | Male   | 48 | 25    |
| 32 | Female | 56 | 32    |
| 33 | Female | 48 | 30    |
| 34 | Female | 56 | 30    |
| 35 | Male   | 60 | 25    |
| 36 | Female | 59 | 32,28 |
| 37 | Female | 60 | 29    |
| 38 | Female | 48 | 28,5  |
| 39 | Male   | 60 | 29    |
| 40 | Female | 60 | 28    |

**Table S5.** Classification of the studied cases according to different parameters (n=40). Qualitative data were described using numbers and percentages, while quantitative data were expressed in mean  $\pm$  SD and median (Min. - Max.)

| Differentiation      | No. (%)             |
|----------------------|---------------------|
| Well                 | 6 (15%)             |
| Moderate             | 24 (60%)            |
| Poor                 | 10 (25%)            |
| Receptor expression  | Value               |
| Tumor                |                     |
| Mean $\pm$ SD.       | 717.4 $\pm$ 1181.5  |
| Median (Min. – Max.) | 275.5 (7 – 4075)    |
| Control              |                     |
| Mean $\pm$ SD.       | 1990.3 $\pm$ 2910.1 |
| Median (Min. – Max.) | 796.5 (99 – 10100)  |
| Site                 | No. (%)             |
| Alveolar             | 8 (20%)             |
| Tongue               | 8 (20%)             |
| Buccal mucosa        | 4 (10%)             |
| Lip                  | 20 (50%)            |

**Table S6.** RNA sequencing analysis of selected nuclear receptors. All values in FPKM.

| Pica                        | Wt       |          |           | Res      |          |           |
|-----------------------------|----------|----------|-----------|----------|----------|-----------|
| Estrogen receptor- $\alpha$ | 0,086986 | 0,156135 | 0,0937655 | 0,12447  | 0,300349 | 0,0756134 |
| Estrogen receptor- $\beta$  | 0,456702 | 0,355594 | 0,485498  | 0,590792 | 0,743111 | 0,206664  |

|                                                               |          |          |          |          |          |           |
|---------------------------------------------------------------|----------|----------|----------|----------|----------|-----------|
| Estrogen-related receptor- $\alpha$                           | 78,5708  | 49,7873  | 51,6182  | 39,9401  | 37,9974  | 49,9846   |
| Hepatocyte nuclear factor-4- $\gamma$                         | 0,707849 | 0,588592 | 0,75755  | 0,130655 | 0,390305 | 0,0678893 |
| Rev-ErbA $\alpha$                                             | 8,59431  | 5,12433  | 4,47826  | 4,75481  | 4,55256  | 5,74921   |
| Rev-ErbA $\beta$                                              | 8,07561  | 7,54943  | 6,36084  | 7,84262  | 7,67867  | 6,58514   |
| Liver X receptor- $\beta$                                     | 47,9511  | 34,3668  | 31,5217  | 32,1372  | 35,2124  | 40,8427   |
| Liver X receptor- $\alpha$                                    | 2,544    | 3,26562  | 2,79666  | 2,8456   | 3,30791  | 4,11189   |
| Testicular receptor 2                                         | 6,73481  | 5,85692  | 7,81062  | 11,3826  | 15,6774  | 11,1582   |
| Testicular receptor 4                                         | 5,51314  | 4,90238  | 4,59446  | 6,63569  | 7,60539  | 5,72504   |
| Glucocorticoid receptor                                       | 13,5492  | 16,2514  | 12,3936  | 18,472   | 17,0918  | 20,8316   |
| Nerve Growth factor I $\beta$                                 | 4,12304  | 4,27002  | 4,8996   | 4,50531  | 8,12497  | 8,35808   |
| Nuclear Receptor Subfamily 4<br>Group A Member 2              | 0,377373 | 0,200647 | 0,122973 | 0,954419 | 1,14045  | 1,17038   |
| Neuron-derived orphan receptor 1                              | 0,101247 | 0,17567  | 0,195954 | 0,198881 | 0,349486 | 0,243172  |
| Liver receptor homolog-1                                      | 0,232363 | 0,354592 | 0,447433 | 0,598797 | 0,640391 | 0,375258  |
| Germ cell nuclear factor                                      | 1,45105  | 1,18439  | 1,23121  | 1,75102  | 1,66925  | 1,07981   |
| Peroxisome proliferator-activated<br>receptor- $\alpha$       | 4,73668  | 4,00861  | 3,18864  | 2,33052  | 3,19441  | 2,94178   |
| Peroxisome proliferator-activated<br>receptor- $\beta/\delta$ | 11,1699  | 6,65914  | 7,88922  | 7,33305  | 6,59849  | 8,66761   |
| Peroxisome proliferator-activated<br>receptor- $\gamma$       | 6,18746  | 7,44107  | 5,52167  | 7,46862  | 6,75023  | 8,36472   |
| Retinoic acid receptor- $\alpha$                              | 13,8344  | 7,73934  | 8,64073  | 6,90167  | 7,92416  | 9,51698   |
| Retinoic acid receptor- $\gamma$                              | 44,4628  | 42,6432  | 41,904   | 30,3559  | 29,1827  | 39,9099   |
| RAR-related orphan receptor- $\alpha$                         | 0,147742 | 0,246185 | 0,148643 | 0,121437 | 0,114879 | 0,056787  |
| Retinoid X receptor- $\alpha$                                 | 96,4527  | 63,4225  | 65,2665  | 39,9713  | 43,2624  | 54,3649   |
| Retinoid X receptor- $\beta$                                  | 24,9242  | 21,9572  | 23,9392  | 17,0627  | 17,579   | 15,4295   |
| Thyroid hormone receptor- $\alpha$                            | 10,283   | 6,00473  | 6,64359  | 2,90511  | 2,47679  | 3,97976   |
| Thyroid hormone receptor- $\beta$                             | 0,922238 | 0,530259 | 0,481687 | 0,30015  | 0,388194 | 0,108029  |
| Vitamin D receptor                                            | 20,9758  | 19,8167  | 16,3955  | 10,8225  | 10,2558  | 15,1325   |

## Supplementary Figures

## VDR-RXR Activation

## Cytoplasm

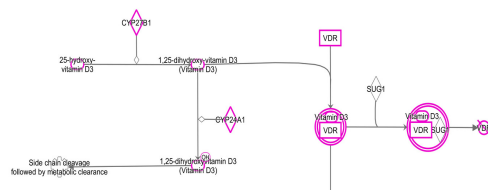

## Nucleus

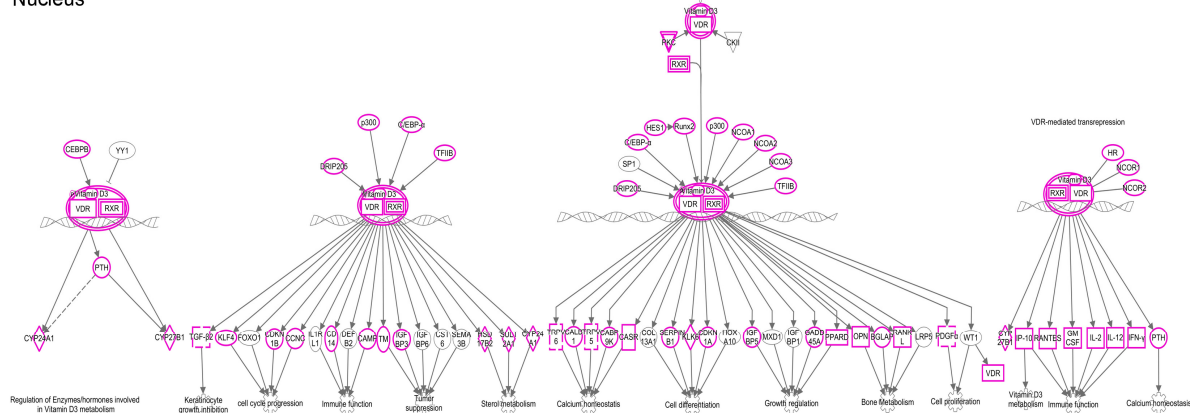

**Figure S1.** Molecular network of VDR-RXR activation interaction partners. Ingenuity pathway analysis of known direct VDR-RXR-interaction partners which are involved in the interaction mechanism. Cellular localization indicated.

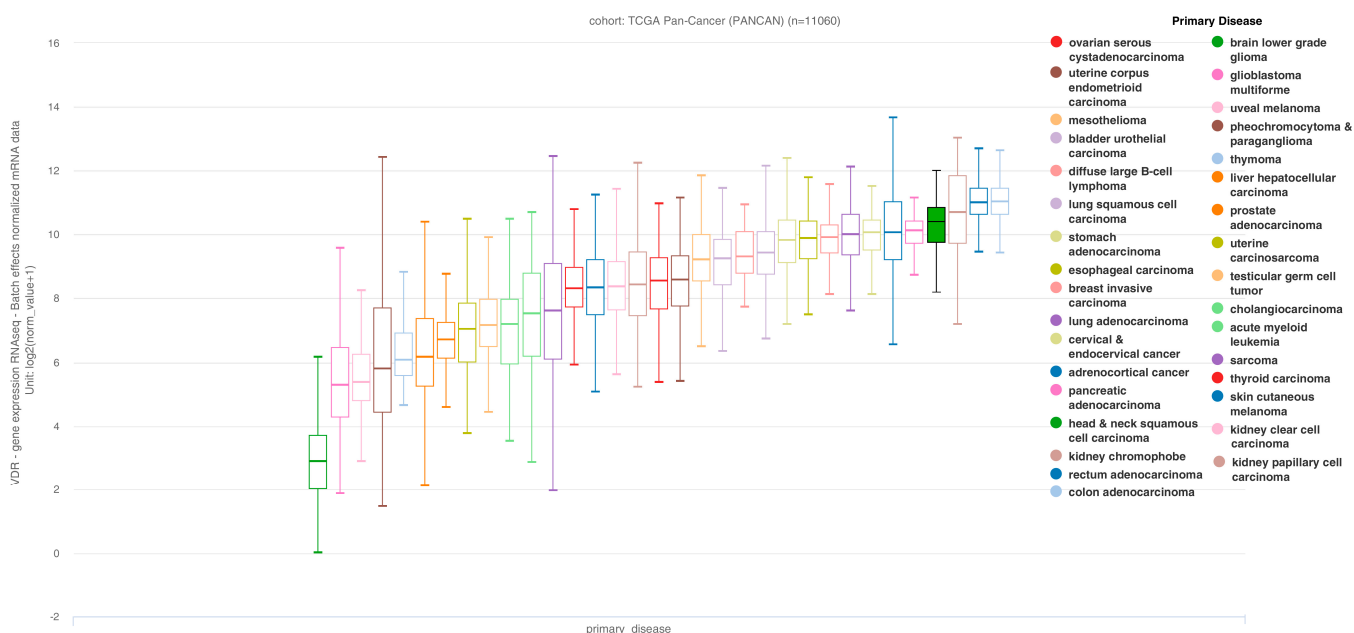

**Figure S2.** VDR mRNA expression in different tumor types according to the PANCAN data set obtained from *The Cancer Genome Atlas* (TCGA). VDR is highly expressed not only in colon adenocarcinomas, but also in HNSCC (green) supporting a pathobiological relevance of VDR for this tumor entity.

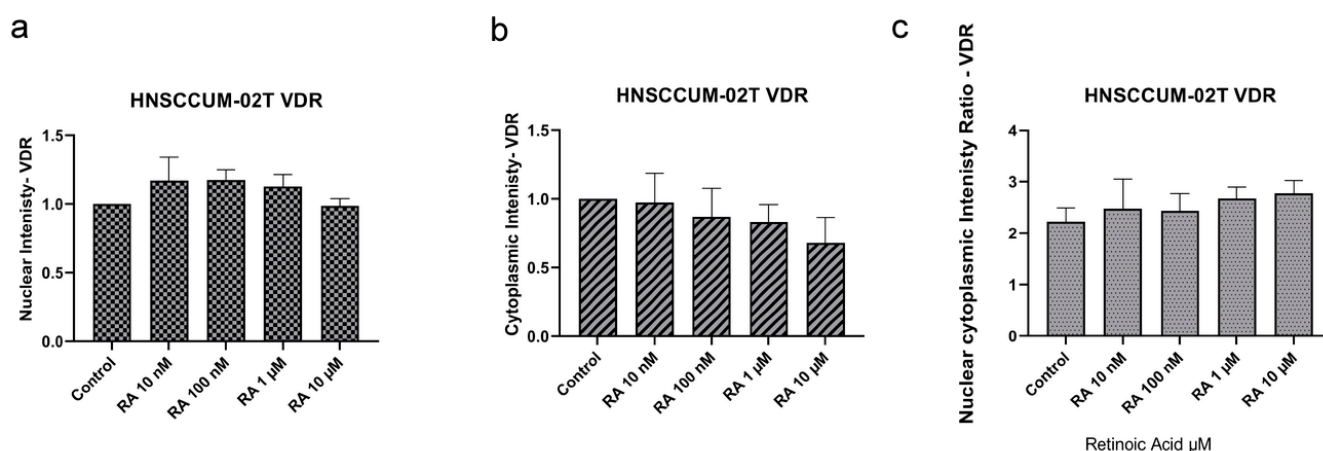

**Figure S3.** VDR translocation after retinoic acid (RA) treatment was automatically quantified by high-throughput microscopy and normalized to untreated controls. Statistical analysis of the (a) nuclear intensity (b) cytoplasmic intensity (c) nucleus-to-cytoplasm ratio (N/C) reveals non-significantly changes in the presence of retinoic acid compared to untreated controls indicating a lack of cytoplasm-to-nuclear translocation.

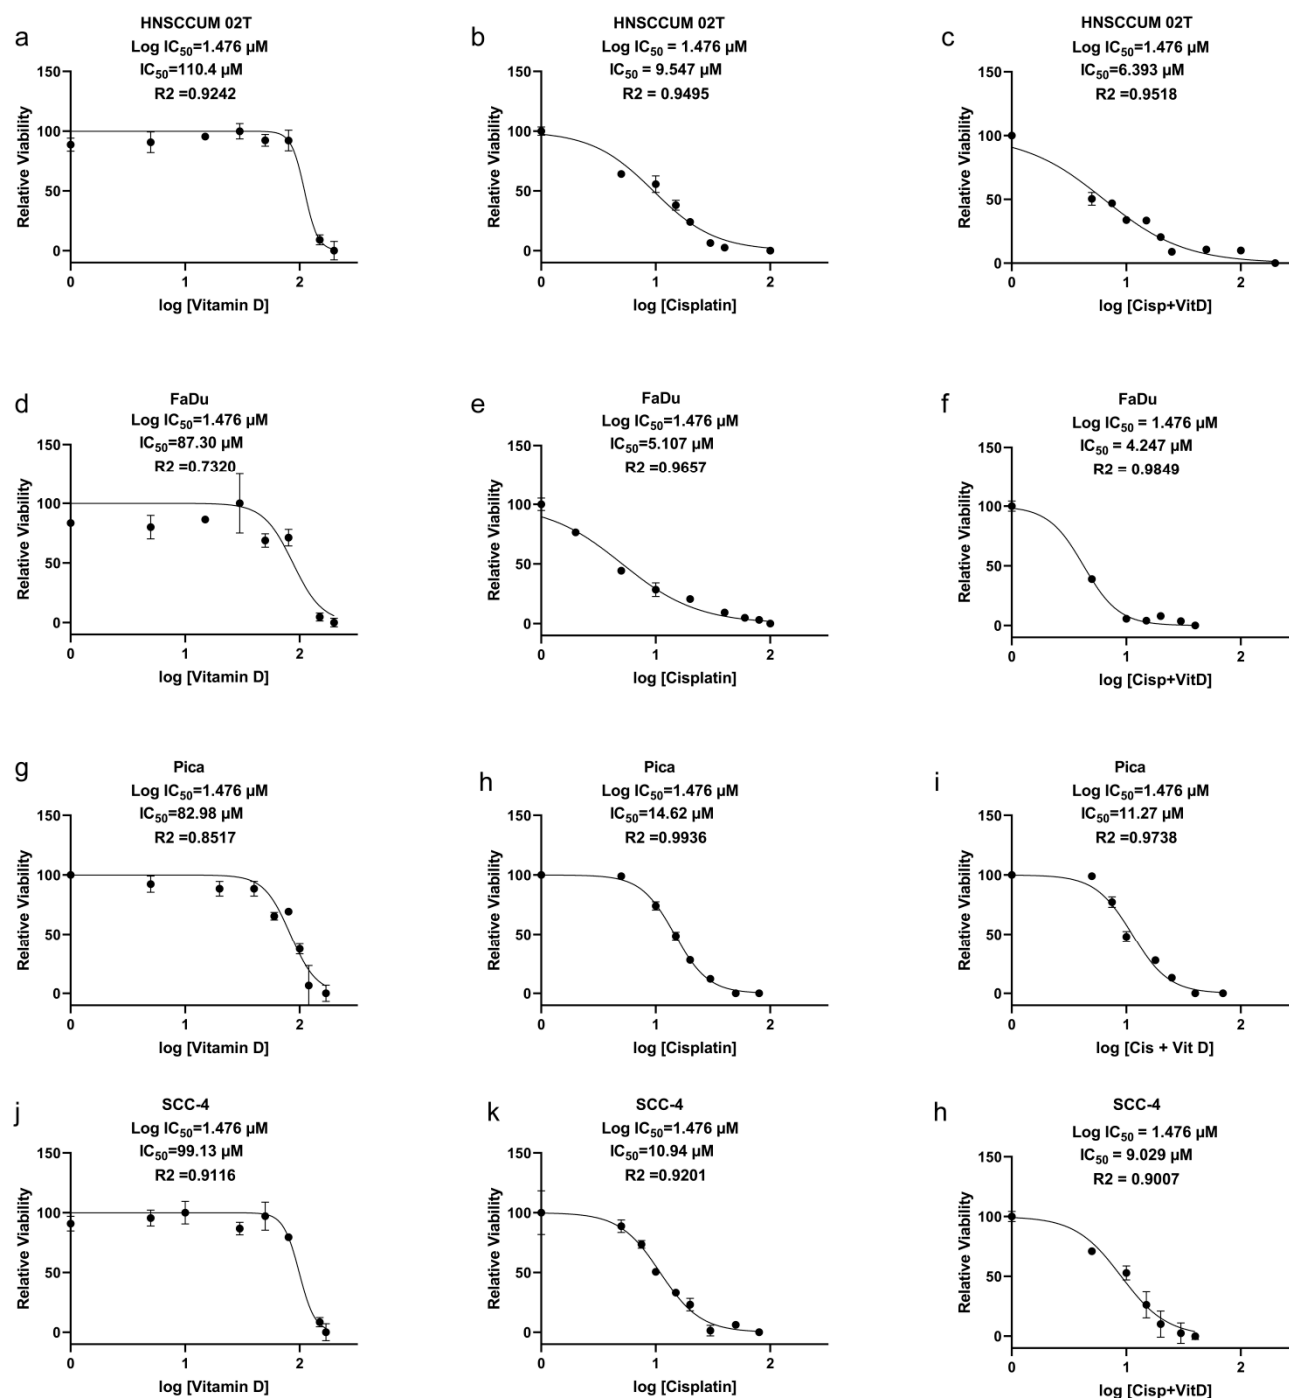

**Figure S4.** Dose-response curves and  $IC_{50}$  values for HNSCCUM-02T (a-c), FaDu (d-f), Pica cells (g-i), and SCC-4 (j-h).

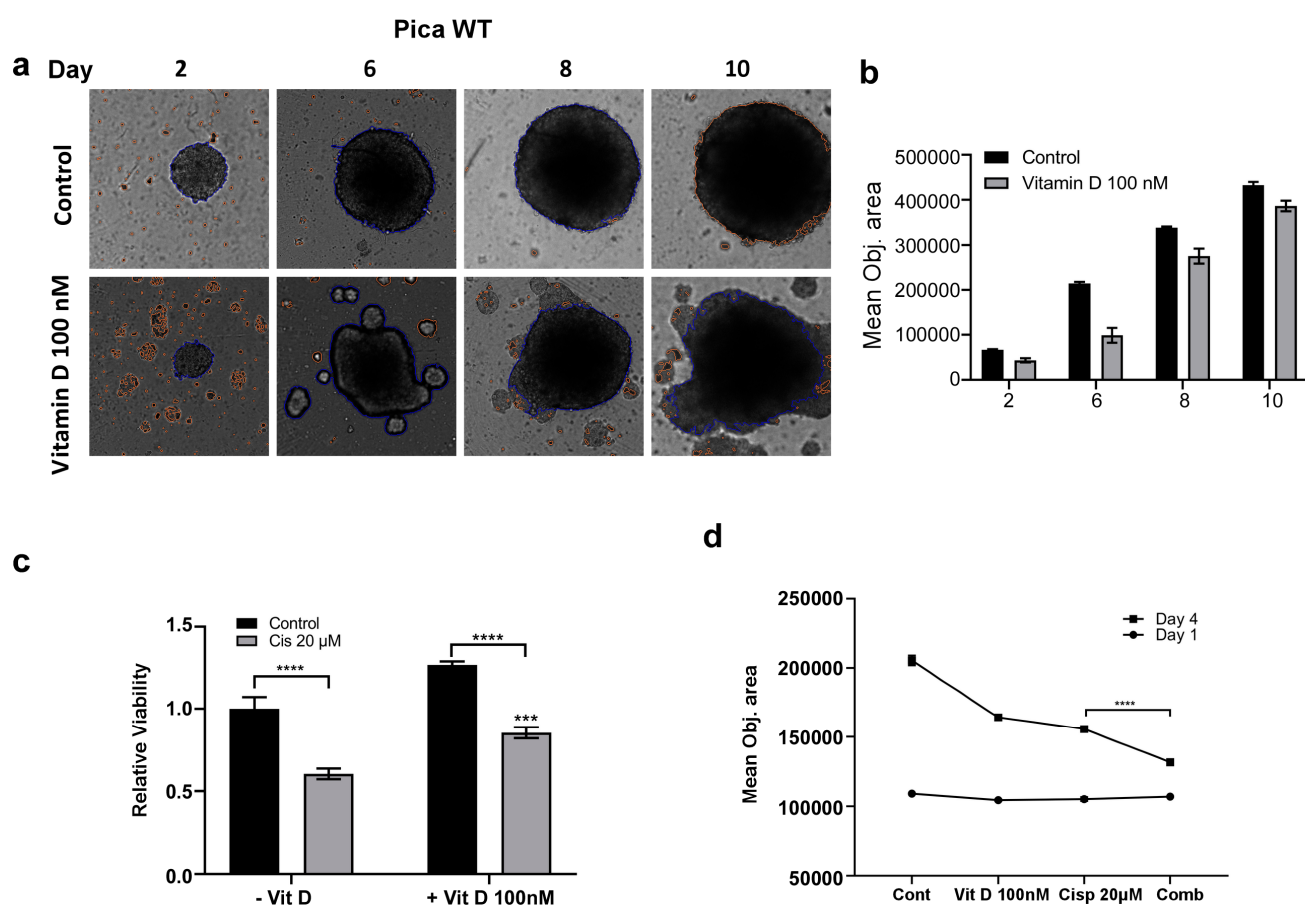

**Figure S5.** Assessing the impact of VitD/VDR targeting in HNSCC 3D tumor spheroids. (a) & (b) Automated high-content microscopy was used to visualize (a) and quantify (b) tumor spheroid growth of Pica<sub>wt</sub> after VitD treatment. Spheroid formation was observed over 10 days without (control) and with the addition of 100nM VitD. The mean object area of Pica<sub>wt</sub> spheroids (n=8) was automatically determined by HCS Array Scan VTI. (c) VitD/cisplatin treatment synergistically inhibits cell proliferation in Pica<sub>wt</sub> cells. Spheroids were treated with VitD (100nM), cisplatin (20 $\mu$ M), and a combination of both for 72 hrs, and viability was normalized to untreated controls. (d) Synergistically killing effect of VitD/cisplatin is also reflected by decreasing spheroid size (area). Mean object sizes of Pica spheroids (n=8) were automatically determined by HCS microscope Array Scan VTI after VitD, cisplatin, and combinational treatment (72 hrs) and normalized to untreated control.

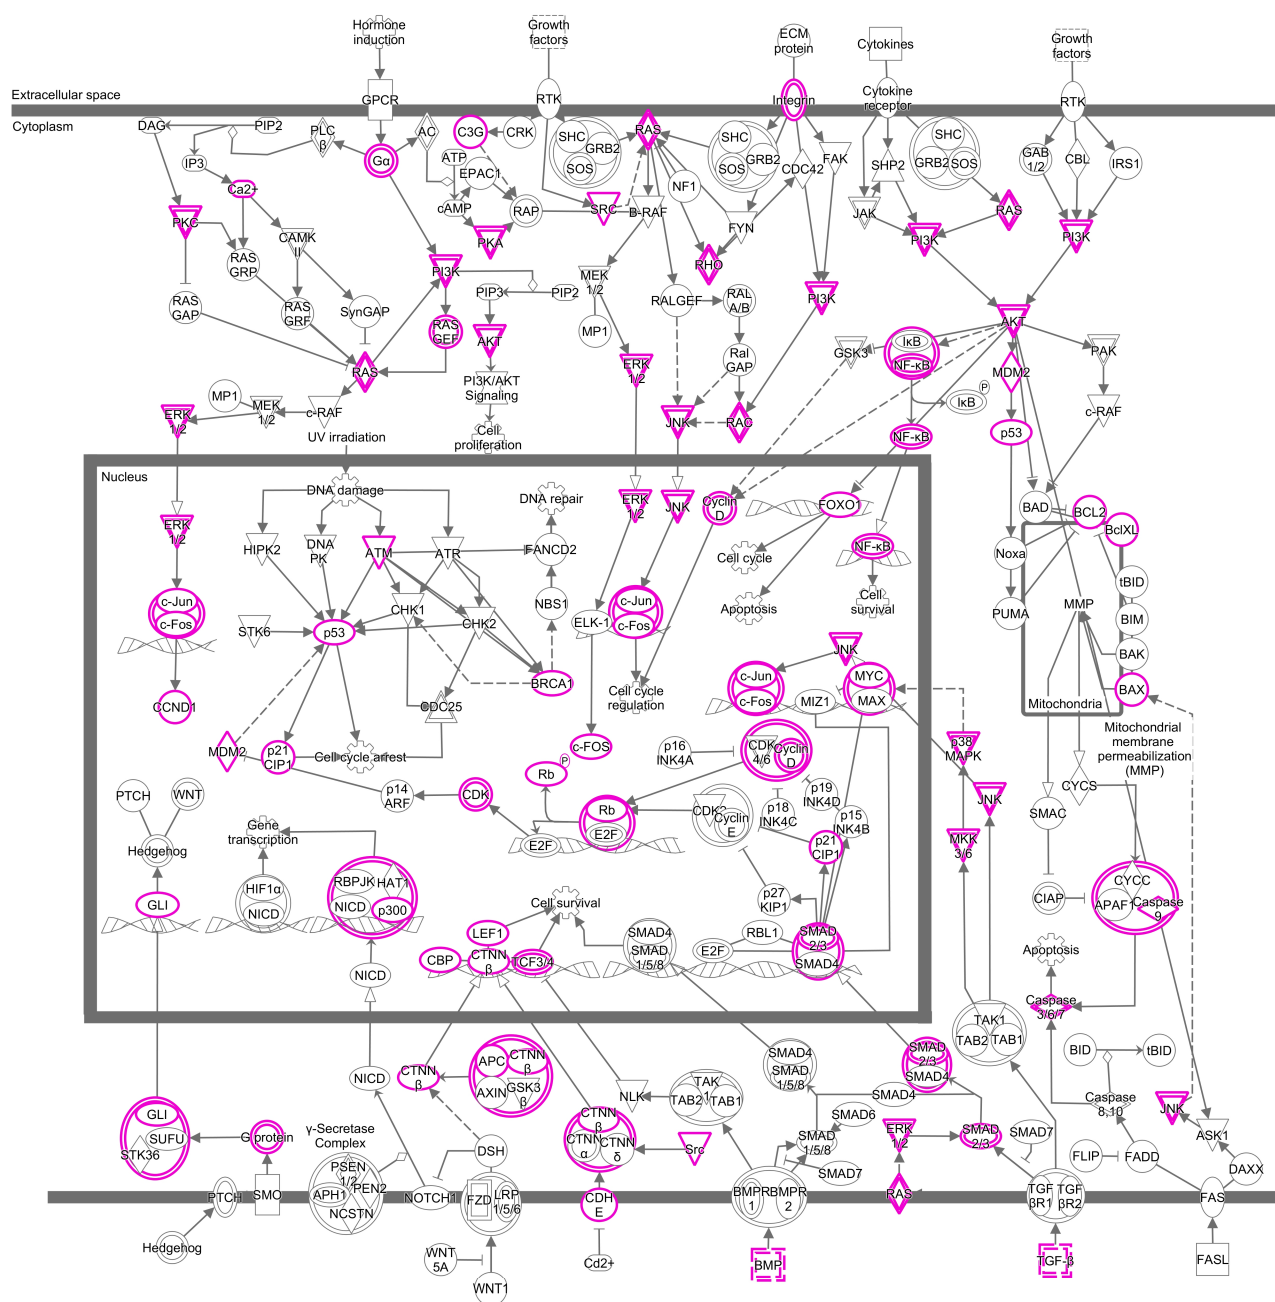

**Figure S6.** Ingenuity Pathway Analysis Molecular mechanism interaction partners involved in cancer diseases. Proteins potentially affected by VitD/VDR activation are highlighted in pink. Cellular localization indicated.

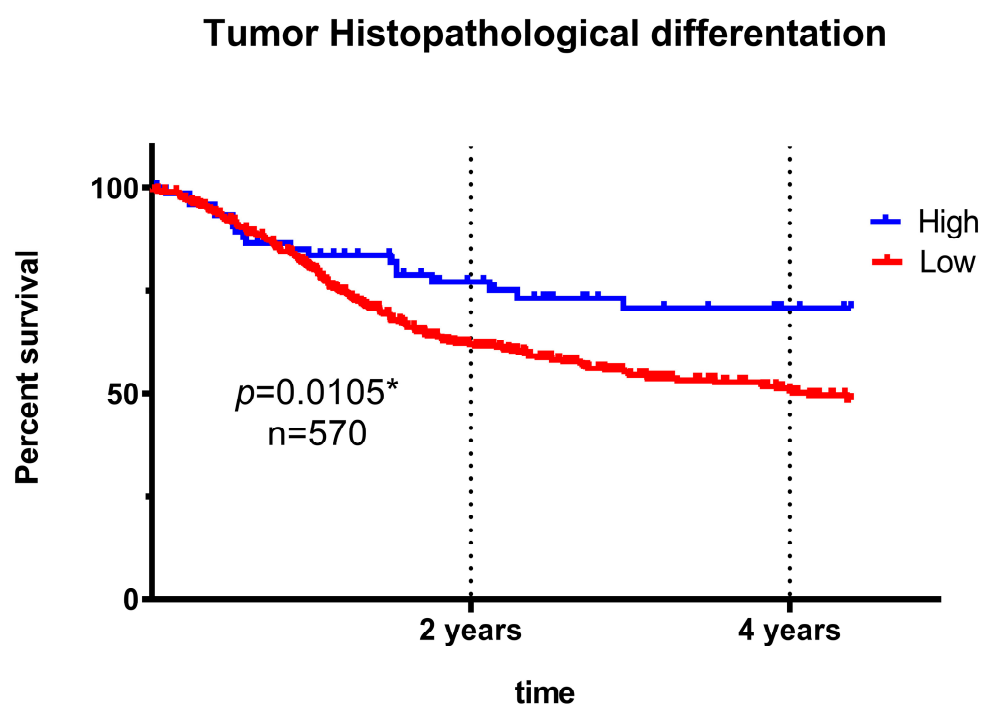

**Figure S7.** Overall survival of HNSCC patients is correlating with tumor histopathological differentiation. Data were obtained from TCGA dataset (n=570). High differentiation (blue) includes G1, and low (red) includes G2&G3.
